# Supplementary material for: What historical landfast ice observations tell us about projected ice conditions in Arctic Archipelagoes and marginal seas under anthropogenic forcing
Source: Copernicus journal article supplement (doi:10.5194/tc-2018-24), 2018-03-07
Supplement: Supplementary file 1 [file tc-2018-24-supplement.pdf]

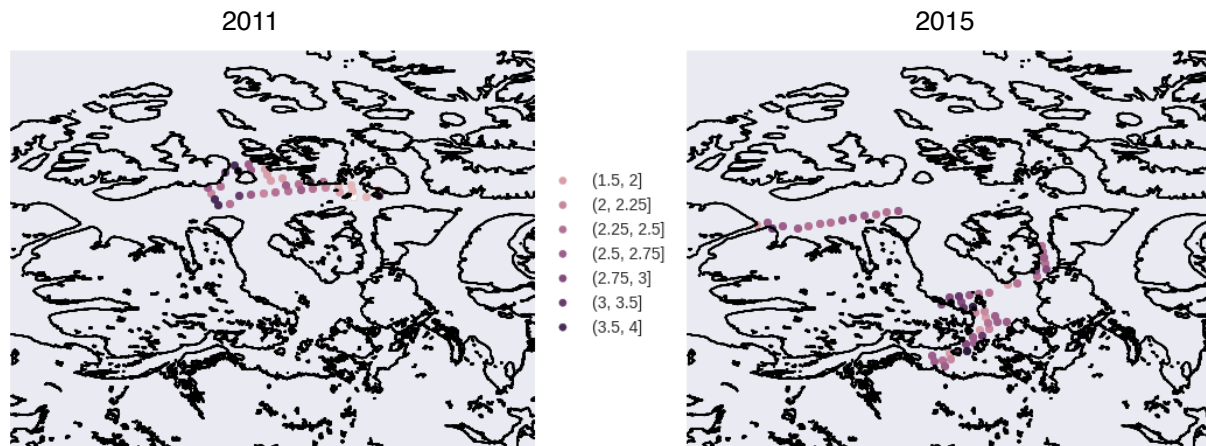

Figure S1. Airborne electromagnetic survey sea ice thickness in 2011 and 2015 averaged on a 25km EASE grid 2.0.

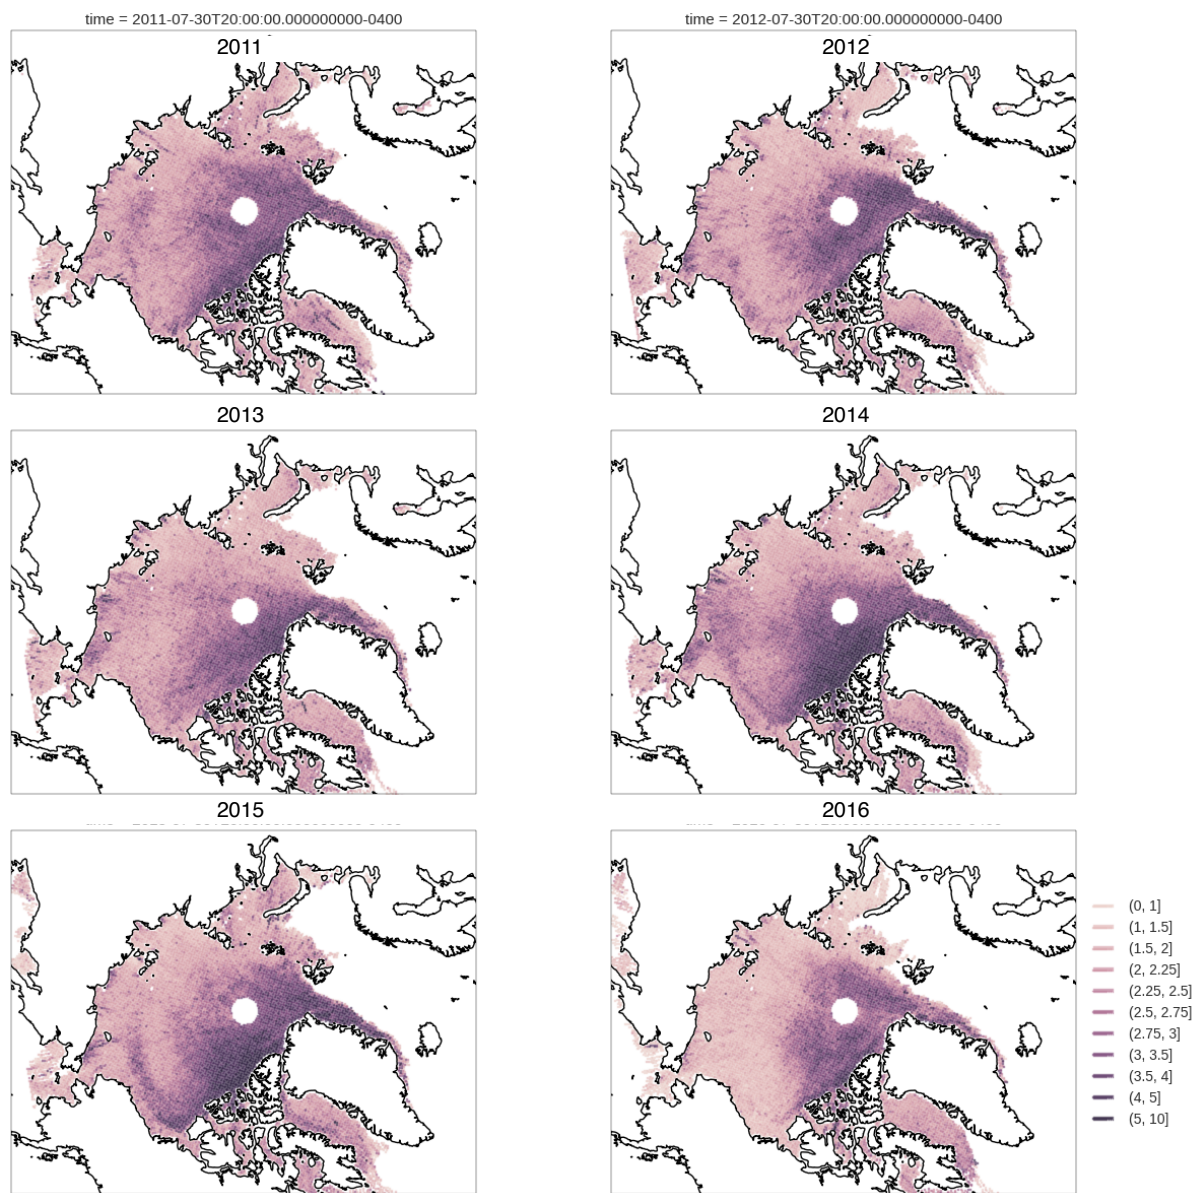

Figure S2. CryoSat2 annual maximum sea ice thickness from 2011 to 2016 on an EASE 2.0 grid.
